# Supplementary material for: A Prussian blue/carbon dot nanocomposite as an efficient visible light active photocatalyst for C-H activation of amines
Source: Royal Society of Chemistry journal article supplement (doi:10.1039/c6pp00203j), 2016-08-29
Supplement: c6pp00203j1.pdf [file c6pp00203j1.pdf]

## Supporting Information

on

### Prussian blue/carbon dots nanocomposite as efficient visible light active photocatalyst for C-H activation of amines

Houcem Maaoui,<sup>a,b</sup> Pawan Kumar,<sup>c,d</sup> Anurag Kumar,<sup>c,d</sup> Guo-Hui Pan,<sup>e</sup> Radouane Chtourou,<sup>f</sup> Sabine Szunerits<sup>a</sup>, Rabah Boukherroub<sup>a\*</sup> and Suman L. Jain<sup>c\*</sup>

<sup>a</sup>*Institut d'Electronique, de Microélectronique et de Nanotechnologie (IEMN), UMR CNRS 8520, Université Lille 1, Avenue Poincaré, BP 60069, 59652 Villeneuve d'Ascq, France*

<sup>b</sup>*Département de Physique, Faculté des Sciences de Tunis, Université Tunis-El Manar, 2092, Tunisia*

<sup>c</sup>*CSIR Indian Institute of Petroleum, Haridwar Road Mohkampur Dehradun 248005 India*

<sup>d</sup>*Academy of Scientific and Industrial Research (AcSIR), New Delhi, 110001, India*

<sup>e</sup>*State Key Laboratory of Luminescence and Applications, Changchun Institute of Optics, Fine Mechanics and Physics, Chinese Academy of Sciences, 3888 Dong Nanhu Road, Changchun 130033, China*

<sup>f</sup>*Centre des Recherches et des Technologies de l'Energie, B.P. 95 Hammam-Lif, 2050, Tunisia*

\* E-mail: [suman@iip.res.in](mailto:suman@iip.res.in); [rabah.boukherroub@univ-lille1.fr](mailto:rabah.boukherroub@univ-lille1.fr)

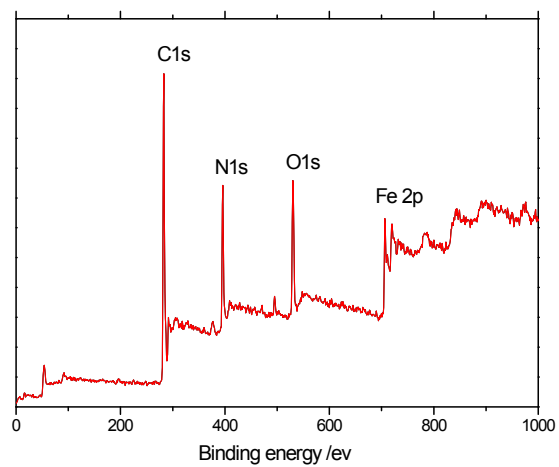

**Fig. S1:** Survey scan of Prussian blue/carbon dots (PB/CDs) nanocomposite.

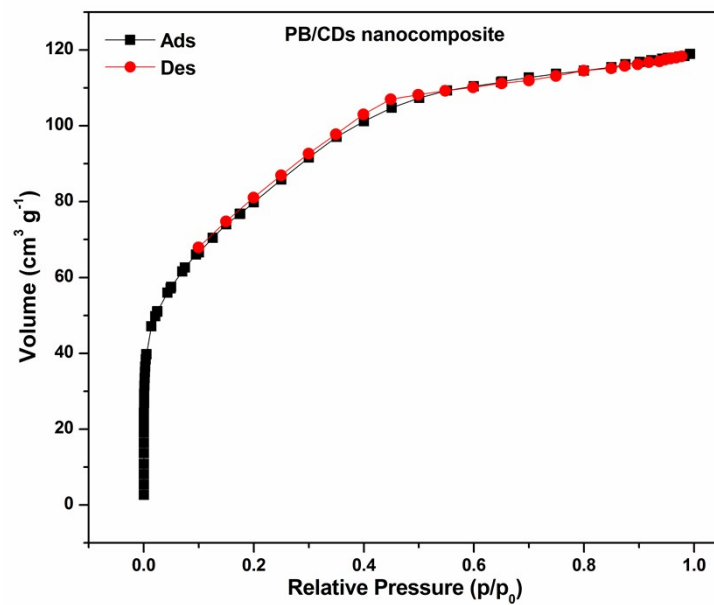

**Fig. S2:** N<sub>2</sub> adsorption/desorption isotherm of Prussian blue/carbon dots (PB/CDs) nanocomposite
